# Supplementary material for: A tunable volatile organic compound sensor by using PtOx/GQDs/TiO2 nanocomposite thin films at room temperature under visible-light activation
Source: Royal Society of Chemistry journal article supplement (doi:10.1039/c7ra07478f), 2017-01-01
Supplement: c7ra07478f1.pdf [file c7ra07478f1.pdf]

## Supporting Information

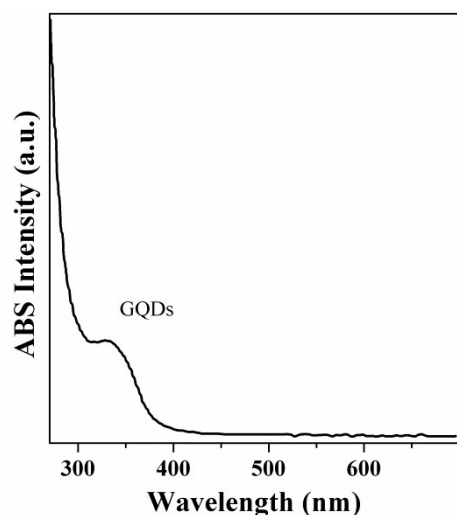

Fig. S1 UV-vis spectrum of GQDs.

Table S1: The band gap energy for different samples

| Sample                   | Band gap energy(eV) |
|--------------------------|---------------------|
| Pt-TiO <sub>2</sub> film | 3.1                 |
| PGT-PS-E1                | 2.68                |
| PGT-PS-E2                | 2.64                |
| PGT-PS-E3                | 2.59                |
| PGT-PS-E4                | 2.70                |

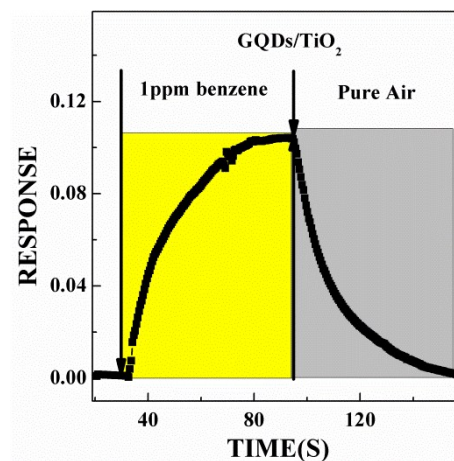

Fig. S3 Typical response and recovery curves of the 3 minutes oxygen-plasma treated GQDs/TiO<sub>2</sub> sensor to benzene gas at 1 ppm.

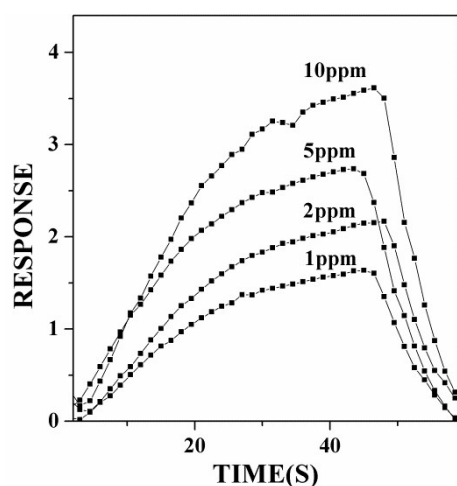

Fig. S2 Response-recovery curves of PGT-PS-E3 to different isopropanol concentrations at room temperature without illumination.
